# Supplementary material
Source: HighWire-hosted journal article supplement (https://annals.highwire.org/content/suppl/2005/04/28/142.9.765)
Supplement: Hayden_AT1_142-9-765-DC1-1.pdf [file Hayden_AT1_142-9-765-DC1-1.pdf]

Appendix Table 1. Characteristics of Included Randomized, Controlled Trials\*

| Study, Year (Reference)          | Patients, <i>n</i> | Study Method <sup>†</sup> | Population Characteristics            |                           |
|----------------------------------|--------------------|---------------------------|---------------------------------------|---------------------------|
|                                  |                    |                           | Source                                | Duration of Low Back Pain |
| <b>Acute populations</b>         |                    |                           |                                       |                           |
| Chok et al., 1999 (62)           | 54                 | +, ?, +, -                | Secondary or tertiary care (referred) | Acute                     |
| Delitto et al., 1993 (65)        | 24                 | - , ? , ? , -             | Secondary or tertiary care (referred) | Acute                     |
| Faas et al., 1993 (37)           | 473                | +, +, +, -                | Primary care                          | Acute                     |
| Farrell and Twomey, 1982 (68)    | 48                 | -, ?, +, +                | Unclear                               | Acute                     |
| Gilbert et al., 1985 (69)        | 187                | -, ?, +, -                | Primary care                          | Acute                     |
| Hides et al., 1996 (95)          | 41                 | +, +, +, -                | Secondary or tertiary care (referred) | Acute                     |
| Malmivaara et al., 1995 (25)     | 186                | +, +, +, +                | Occupational                          | Acute                     |
| Seferlis et al., 1998 (76)       | 180                | -, ?, -, +                | Occupational                          | Acute                     |
| Stankovic and Johnell, 1990 (54) | 100                | +, +, +, ?                | Unclear                               | Acute                     |
| Underwood and Morgan, 1998 (80)  | 75                 | +, +, +, -                | Primary care                          | Acute                     |
| Waterworth and Hunter, 1985 (81) | 108                | -, -, +, -                | Primary care                          | Acute                     |
| <b>Subacute populations</b>      |                    |                           |                                       |                           |
| Cherkin et al., 1998 (35)        | 321                | +, +, +, -                | Secondary or tertiary care (referred) | Subacute                  |
| Davies et al., 1979 (64)         | 43                 | -, ?, +, +                | Primary care                          | Subacute                  |
| Lindström et al., 1992 (22)      | 103                | +, +, +, +                | Occupational                          | Subacute <sup>§</sup>     |
| Moffett et al., 1999 (47)        | 187                | +, +, +, -                | Primary care                          | Subacute <sup>§</sup>     |
| Staal et al., 2004 (90)          | 134                | +, +, +, -                | Occupational                          | Subacute                  |
| Storheim et al., 2003 (91)       | 93                 | +, +, -, -                | Occupational                          | Subacute                  |
| <b>Chronic populations</b>       |                    |                           |                                       |                           |
| Alexandre et al., 2001 (56)      | 33                 | ?, ?, +, ?                | Occupational                          | Chronic                   |
| Aure et al., 2003 (32)           | 49                 | +, +, +, -                | Occupational                          | Chronic                   |

Appendix Table 1—Continued

| Exercise Description                                                                                                                                          | Exercise Intervention Characteristics |                                        |                                                          | Comparison Group                                                      |
|---------------------------------------------------------------------------------------------------------------------------------------------------------------|---------------------------------------|----------------------------------------|----------------------------------------------------------|-----------------------------------------------------------------------|
|                                                                                                                                                               | Intervention Time, h <sup>±</sup>     | Delivery Format                        | Other Interventions                                      |                                                                       |
| 1) Extensor endurance program: aerobics, stretching, strengthening                                                                                            | 13.5                                  | Individual                             | Advice to stay active or education; passive modality     | No treatment                                                          |
| 1) Williams flexion exercise regimen with home exercises                                                                                                      | 7.3                                   | Individual                             | Manual therapy                                           |                                                                       |
| 2) McKenzie regimen, plus long-lever manipulation                                                                                                             | 7.3                                   | Individual                             | Manual therapy                                           |                                                                       |
| 1) 8 exercises: "resting position," side bending, stretching, isometric abdominal strengthening                                                               | 3.3                                   | Individual                             | Advice to stay active or education; analgesics or NSAIDs | 1) Sham treatment                                                     |
| 1) Isometric abdominal exercises, ergonomic advice, home abdominal exercises                                                                                  | 2.7                                   | Individual; independent home exercises | Advice to stay active or education; passive modality     | 2) Usual general practitioner care<br>Other conservative treatment    |
| 1) Adapted Kendall flexion routine (home program), education, plus analgesics                                                                                 | 4.8                                   | Independent home exercises             | Advice to stay active or education; analgesics or NSAIDs | 1) Usual general practitioner care                                    |
| 2) Exercise, education, plus bed rest for 4 d                                                                                                                 | 4.8                                   | Independent home exercises             | Education; bed rest                                      | 2) Other conservative treatment                                       |
| 1) Multifidus isometric retraining                                                                                                                            | NA                                    | NA                                     | Advice to stay active or education; analgesics or NSAIDs | Usual general practitioner care                                       |
| 1) Flexibility or mobilizing exercises: back extension, lateral bending movements                                                                             | 10                                    | Independent home exercises             | Advice to stay active or education; analgesics or NSAIDs | 1) No treatment<br>2) Other conservative treatment                    |
| 1) Intensive training program: information, muscle training, and general conditioning                                                                         | 130.5                                 | Group                                  | Advice to stay active or education                       | 1) Other conservative<br>2) Usual general practitioner care treatment |
| 1) McKenzie analysis and exercises                                                                                                                            | 2                                     | Individual; independent home exercises | Advice to stay active or education                       | No treatment                                                          |
| 1) Education on McKenzie principles, teaching extension exercises, plus general advice                                                                        | 1.8                                   | Group                                  | Advice to stay active or education; analgesics or NSAIDs | Usual general practitioner care                                       |
| 1) Conservative physiotherapy including active flexion and extension exercises                                                                                | 6.3                                   | Individual                             | Advice to stay active or education                       | 1) Other conservative treatment<br>2) Other conservative treatment    |
| 1) McKenzie exercise program (trained physiotherapists, centralize symptoms)                                                                                  | 7.3                                   | Individual                             | Advice to stay active or education                       | 1) No treatment                                                       |
| 1) Extension exercises ("prone, raising trunk" described as back-muscle strengthening)                                                                        | 9.6                                   | Individual                             | Passive modality                                         | Other conservative treatment                                          |
| 2) Flexion exercises (described as "mobilizing")                                                                                                              | 9.6                                   | Individual                             | Passive modality                                         |                                                                       |
| 1) Individual graded-activity program (quota-based): endurance, strengthening, aerobics                                                                       | 133                                   | Individual; independent home exercises | Advice to stay active or education; back school          | Usual general practitioner care                                       |
| 1) Aerobics, strengthening, stretching                                                                                                                        | 8                                     | Group                                  | Behavioral therapy; advice to stay active or education   | Usual general practitioner care                                       |
| 1) Graded-activity program                                                                                                                                    | 13                                    | Individual                             | Advice to stay active or education                       | Usual general practitioner care                                       |
| 1) Intensive training program: aerobic, strength, flexibility                                                                                                 | 31                                    | Group                                  | None                                                     | 1) Other conservative treatment<br>2) Usual general practitioner care |
| 1) Several components: exercise, plus home exercises                                                                                                          | 24                                    | Group                                  | Advice to stay active or education                       | No treatment                                                          |
| 1) Stretching exercises (2 of 3); passive manipulation (1 of 3)                                                                                               | 10                                    | Individual; independent home exercises | Manual therapy; analgesics or NSAIDs                     |                                                                       |
| 2) Individually designed: strengthening, stretching, mobilizing, coordination, and stabilizing exercises for abdomen, back, pelvis, and lower limb; equipment | 10                                    | Individual; independent home exercises | Analgesics or NSAIDs                                     |                                                                       |

Continued on following page

Appendix Table 1—Continued

| Study, Year (Reference)                   | Patients, <i>n</i> | Study Method <sup>†</sup> | Population Characteristics            |                           |
|-------------------------------------------|--------------------|---------------------------|---------------------------------------|---------------------------|
|                                           |                    |                           | Source                                | Duration of Low Back Pain |
| Bendix et al., 2000 (60)                  | 138                | ?, ?, -, -                | Occupational                          | Chronic                   |
| Bendix et al., 1995 (57)                  | 106                | +, ?, -, -                | Secondary or tertiary care (referred) | Chronic                   |
| Bentsen et al., 1997 (33)                 | 74                 | +, +, +, -                | General population                    | Chronic <sup>§</sup>      |
| Bronfort et al., 1996 (34)                | 103                | +, +, -, +                | General population                    | Chronic                   |
| Buswell, 1982 (61)                        | 50                 | -, ?, -, -                | Primary care                          | Chronic <sup>§</sup>      |
| Calmels et al., 2004 (83)                 | 17                 | ?, ?, +, -                | Secondary or tertiary care (referred) | Chronic                   |
| Dalichau and Scheele, 2000 (63)           | 63                 | ?, ?, +, -                | Secondary or tertiary care (referred) | Chronic                   |
| Descarreaux et al., 2002 (66)             | 20                 | +, -, +, -                | General population                    | Chronic <sup>§</sup>      |
| Deyo et al., 1990 (18)                    | 125                | +, +, +, +                | General population                    | Chronic                   |
| Elnaggar et al., 1991 (36)                | 56                 | +, +, -, +                | Secondary or tertiary care (referred) | Chronic                   |
| Frost et al., 1995 (19)                   | 71                 | +, +, +, +                | Primary care                          | Chronic                   |
| Frost et al., 2004 (84)                   | 286                | +, +, -, -                | Secondary or tertiary care (referred) | Chronic <sup>§</sup>      |
| Galantino et al., 2004 (85) <sup>  </sup> | 22                 | +, ?, -, -                | Mixed                                 | Chronic                   |
| Gur et al., 2003 (86)                     | 75                 | ?, ?, +, -                | Secondary or tertiary care (referred) | Chronic                   |
| Hansen et al., 1993 (21)                  | 180                | +, +, +, +                | Mixed                                 | Chronic <sup>§</sup>      |
| Hemmilä et al., 1997 (40)                 | 114                | -, +, +, +                | Mixed                                 | Chronic                   |
| Hildebrandt et al., 2000 (43)             | 222                | +, +, -, -                | Primary care                          | Chronic                   |

Appendix Table 1—Continued

| Exercise Description                                                                                              | Exercise Intervention Characteristics |                                        |                                                      | Comparison Group                                                   |
|-------------------------------------------------------------------------------------------------------------------|---------------------------------------|----------------------------------------|------------------------------------------------------|--------------------------------------------------------------------|
|                                                                                                                   | Intervention Time, h <sup>±</sup>     | Delivery Format                        | Other Interventions                                  |                                                                    |
| 1) Aerobics and strengthening (machines)                                                                          | 36                                    | Group                                  | None                                                 |                                                                    |
| 2) Functional restoration; comprehensive multidisciplinary approach including aerobics, strengthening, stretching | 36                                    | Group                                  | Behavioral therapy; back school                      |                                                                    |
| 1) Functional restoration; comprehensive multidisciplinary approach including aerobics, strengthening, stretching | 24                                    | Group                                  | Behavioral therapy; back school                      | Other conservative treatment                                       |
| 2) Aerobics and strengthening                                                                                     | 24                                    | Group                                  | Back school                                          |                                                                    |
| 1) Dynamic strength back exercises: at gym and home                                                               | 21.8                                  | Individual; independent home exercises | None                                                 |                                                                    |
| 2) Home exercises                                                                                                 | 21.8                                  | Independent home exercises only        | None                                                 |                                                                    |
| 1) Dynamic trunk (Manniche) and abdominal strengthening                                                           | 20                                    | Individual                             | Manual therapy                                       | Other conservative treatment                                       |
| 2) Same exercise plus NSAIDs                                                                                      | 20                                    | Individual                             | Analgesics or NSAIDs                                 |                                                                    |
| 1) Extension exercise program (cites McKenzie)                                                                    | 11                                    | Individual                             | Manual therapy; advice to stay active or education   |                                                                    |
| 2) Flexion program (mobilizing exercises plus posture)                                                            | 11                                    | Individual                             | Manual therapy; advice to stay active or education   |                                                                    |
| 1) Isokinetic strengthening exercises (Cybex [Medway, Massachusetts] machines)                                    | 4.5                                   | Individual                             | Manual therapy                                       |                                                                    |
| 2) Physiotherapy exercises: series of 3 groups of exercises (whole body)                                          | 4.5                                   | Individual                             | None                                                 |                                                                    |
| 1) Strengthening: warm-up aerobic exercises, 60-min equipment training (total body)                               | 12                                    | Individual                             | Lumbar support                                       | No treatment                                                       |
| 2) Same as above with no lumbar support during exercises                                                          | 12                                    | Individual                             | None                                                 |                                                                    |
| 1) Standard stretching or strengthening program                                                                   | 18.3                                  | Independent home exercises             | None                                                 |                                                                    |
| 2) Force, extensibility exercises of trunk and hip muscles based on initial evaluation; targeted increased        | 18.3                                  | Supervised home exercises              | None                                                 |                                                                    |
| 1) 12 sequential relaxation and stretching exercises (improve flexibility); exercises plus TENS                   | 10.6                                  | Supervised home exercises              | Advice to stay active or education; passive modality | Other conservative treatment                                       |
| 1) Extension exercises ("prone, raising trunk" described as back-muscle strengthening)                            | 7                                     | Supervised home exercises              | None                                                 |                                                                    |
| 2) Flexion exercises (described as "mobilizing")                                                                  | 7                                     | Supervised home exercises              | None                                                 |                                                                    |
| 1) Warm-up, stretching, progressive exercises, light aerobic and advice, plus back school                         | 8                                     | Group                                  | Advice to stay active or education; back school      | Other conservative treatment                                       |
| 1) Standard physiotherapy: 94% received exercises (stretching, strengthening, mobility exercises)                 | 3.5                                   | Individual                             | Manual therapy; advice to stay active or education   | Other conservative treatment                                       |
| 1) Hatha yoga: sequence of postures that leads to a state of relaxation (strength, flexibility, balance)          | 19.5                                  | Group; independent home exercises      | None                                                 | No treatment                                                       |
| 1) Stretching and strengthening exercises of lumbar and extremity muscle groups                                   | 5                                     | Independent home exercises             | None                                                 | Other conservative treatment                                       |
| 2) Same exercises as above with additional intervention                                                           | 5                                     | Independent home exercises             | Low-power laser therapy                              |                                                                    |
| 1) Intensive dynamic back-muscle training: extension strengthening                                                | 8                                     | Individual                             | None                                                 | 1) Other conservative treatment<br>2) Other conservative treatment |
| 1) Bending, rotation exercises; "auto-stretching when appropriate"                                                | 13.8                                  | Independent home exercises             | None                                                 | 1) Other conservative treatment<br>2) Other conservative treatment |
| 1) Postural exercises (Cesar therapy)                                                                             | 10.5                                  | Individual                             | None                                                 | Usual general practitioner care                                    |

Continued on following page

Appendix Table 1—Continued

| Study, Year (Reference)            | Patients, <i>n</i> | Study Method <sup>†</sup> | Population Characteristics            |                           |
|------------------------------------|--------------------|---------------------------|---------------------------------------|---------------------------|
|                                    |                    |                           | Source                                | Duration of Low Back Pain |
| Johannsen et al., 1995 (70)        | 27                 | –, ?, –, –                | Secondary or tertiary care (referred) | Chronic                   |
| Jousset et al., 2004 (87)          | 85                 | +, ?, +, –                | Occupational                          | Chronic                   |
| Kankaanpää et al., 1999 (44)       | 54                 | +, +, +, –                | Occupational                          | Chronic                   |
| Kendall and Jenkins, 1968 (71)     | 42                 | –, ?, +, –                | Primary care                          | Chronic                   |
| Kuukkanen and Mälikä, 2000 (72)    | 57                 | ?, ?, +, –                | Occupational                          | Chronic <sup>§</sup>      |
| Lidström and Zachrisson, 1970 (73) | 62                 | –, ?, +, ?                | Secondary or tertiary care (referred) | Chronic <sup>§</sup>      |
| Lie and Frey, 1999 (74)            | 27                 | +, ?, –, +                | Primary care                          | Chronic                   |
| Manniche et al., 1988 (26)         | 105                | +, +, +, +                | Secondary or tertiary care (referred) | Chronic                   |
| Mannion et al., 1999 (29)          | 148                | +, +, +, +                | General population                    | Chronic                   |
| Moseley, 2002 (48)                 | 57                 | +, +, –, –                | Primary care                          | Chronic                   |
| Niemistö et al., 2003 (88)         | 204                | +, +, +, –                | General population                    | Chronic                   |
| Petersen et al., 2002 (49)         | 260                | +, +, –, +                | Secondary or tertiary care (referred) | Chronic                   |
| Preyde, 2000 (50)                  | 98                 | +, –, +, +                | Mixed                                 | Chronic <sup>§</sup>      |
| Rasmussen-Barr et al., 2003 (89)   | 47                 | ?, ?, –, –                | Primary care                          | Chronic <sup>§</sup>      |
| Risch et al., 1993 (75)            | 54                 | –, –, +, –                | Secondary or tertiary care (referred) | Chronic                   |

Appendix Table 1—Continued

| Exercise Description                                                                                             | Exercise Intervention Characteristics |                                        |                                                        | Comparison Group                                                   |
|------------------------------------------------------------------------------------------------------------------|---------------------------------------|----------------------------------------|--------------------------------------------------------|--------------------------------------------------------------------|
|                                                                                                                  | Intervention Time, h <sup>±</sup>     | Delivery Format                        | Other Interventions                                    |                                                                    |
| 1) Aerobics, exercises emphasizing coordination, balance, stability, stretching                                  | 24                                    | Group                                  | None                                                   |                                                                    |
| 2) Aerobics, dynamic exercises emphasizing muscle endurance: abdominal, shoulder, hip muscle stretching          | 24                                    | Group                                  | None                                                   |                                                                    |
| 1) Functional restoration                                                                                        | 150                                   | Group                                  | None                                                   |                                                                    |
| 2) Active individual therapy (strengthening, stretching, aerobics recommended)                                   | 19                                    | Individual; independent home exercises | Advice to stay active or education                     |                                                                    |
| 1) Strengthening (machines) with stretching, coordination (David Beck Clinic program)                            | 36                                    | Group                                  | Behavioral therapy; advice to stay active or education | Other conservative treatment                                       |
| 1) Mobilizing, strengthening, posture                                                                            | 7.9                                   | Independent home exercises             | Advice to stay active or education                     |                                                                    |
| 2) Isometric flexion exercises: strengthening abdominal and trunk muscles (2 exercises)                          | 7.9                                   | Independent home exercises             | Advice to stay active or education                     |                                                                    |
| 3) Strengthening extension muscles, posture, lifting                                                             | 7.9                                   | Independent home exercises             | Advice to stay active or education                     |                                                                    |
| 1) Strengthening, endurance, balance and coordination                                                            | 21                                    | Independent home exercises only        | None                                                   | No treatment                                                       |
| 1) Mobilizing (kneeling and supine) and strengthening (isotonic abdominal and back) exercises and home exercises | 4.8                                   | Individual; independent home exercises | Passive modality                                       | 1) Other conservative treatment<br>2) Other conservative treatment |
| 1) Mobilizing and stretching, walking in "flexible way"                                                          | 15                                    | Group; independent home exercises      | None                                                   |                                                                    |
| 2) Stabilizing exercises and walking without instructions                                                        | 15                                    | Group; independent home exercises      | None                                                   |                                                                    |
| 1) Intensive strengthening: trunk, back strengthening routine                                                    | 45                                    | Individual                             | None                                                   |                                                                    |
| 2) Back strengthening routine; similar to group 1, lower dose                                                    | 45                                    | Individual                             | None                                                   |                                                                    |
| 3) Isometric exercises for lower back                                                                            | 45                                    | Individual                             | Manual therapy; passive modality                       |                                                                    |
| 1) Aerobics, stretching                                                                                          | 24                                    | Group                                  | None                                                   |                                                                    |
| 2) Controlled progressive exercises with machines (David Beck Clinic program)                                    | 24                                    | Group                                  | None                                                   |                                                                    |
| 3) Physiotherapy including exercises using resistance bands and general strength training                        | 17.6                                  | Individual                             | Ergonomic advice; passive modality                     |                                                                    |
| 1) Specific trunk muscle training: individualized with home exercise program (Richardson and Jull)               | 12                                    | Individual; independent home exercises | Manual therapy; advice to stay active or education     | Usual general practitioner care                                    |
| 1) Stabilizing exercises aiming to correct lumbopelvic rhythm                                                    | 4                                     | Individual; independent home exercises | Manual therapy; advice to stay active or education     | Usual general practitioner care                                    |
| 1) Strengthening training: stationary bike, intensive dynamic back strengthening in flexion and extension        | 6.9                                   | Group                                  | None                                                   |                                                                    |
| 2) McKenzie therapy                                                                                              | 6.9                                   | Individual                             | None                                                   |                                                                    |
| 1) Stretching, flexion or extension, "general strengthening or mobility"                                         | 2                                     | Individual                             | Manual therapy                                         | 1) Sham treatment                                                  |
| 2) Comprehensive massage (massage and exercises)                                                                 | 2                                     | Individual                             | Advice to stay active or education                     | 2) Other conservative treatment                                    |
| 1) Stabilizing exercises: activation and control deep abdominal, multifidus muscles                              | 7                                     | Individual; supervised home exercises  | Advice to stay active or education                     | Other conservative treatment                                       |
| 1) Dynamic extension strengthening program (machine)                                                             | 11.4                                  | Individual                             | None                                                   | No treatment                                                       |

Continued on following page

Appendix Table 1—Continued

| Study, Year (Reference)                             | Patients, <i>n</i> | Study Method <sup>†</sup> | Population Characteristics            |                           |
|-----------------------------------------------------|--------------------|---------------------------|---------------------------------------|---------------------------|
|                                                     |                    |                           | Source                                | Duration of Low Back Pain |
| Rittweger et al., 2002 (51)                         | 60                 | +, +, +, -                | General population                    | Chronic                   |
| Lønn et al., 1999 (46);<br>Soukup et al., 1999 (52) | 120                | +, +, +, -                | Mixed                                 | Chronic <sup>§</sup>      |
| Torstensen et al., 1998 (31)                        | 208                | +, +, +, +                | Occupational                          | Chronic                   |
| Tritilanunt and Wajanavisit, 2001 (78)              | 72                 | +, ?, +, -                | Secondary or tertiary care (referred) | Chronic                   |
| Turner et al., 1990 (79)                            | 96                 | +, +, -, -                | Mixed                                 | Chronic                   |
| Yelland et al., 2004 (92)                           | 110                | +, +, +, -                | Mixed                                 | Chronic                   |
| Yeung et al., 2003 (93)                             | 52                 | ?, +, +, -                | Primary care                          | Chronic                   |
| Yozbatiran et al., 2004 (94)                        | 30                 | ?, ?, +, -                | Secondary or tertiary care (referred) | Chronic                   |
| Zylbergold and Piper, 1981 (82)                     | 28                 | -, ?, +, -                | Primary care                          | Chronic <sup>§</sup>      |
| <b>Unclear population</b>                           |                    |                           |                                       |                           |
| Ljunggren et al., 1997 (45)                         | 126                | +, +, +, -                | Primary care                          | Unclear                   |

\* 61 studies were included: 11, 6, and 43 in acute, subacute, and chronic low back pain populations, respectively (1 unclear). + = yes; - = no; ? = unknown; NA = not applicable; NSAIDs = nonsteroidal anti-inflammatory drugs; TENS = transcutaneous electrical nerve stimulation.

<sup>†</sup> Study method factors: adequate randomization, allocation concealment, adequate follow-up, outcome assessor blinding.

<sup>‡</sup> Intervention time calculated as “best estimate” when a home exercise program was used and study adherence information was not available (see text).

<sup>§</sup> Sensitivity analysis as “mixed” population.

|| Galantino et al. (85) was excluded from quantitative syntheses because of flaw: small study with >50% loss to follow-up.

Appendix Table 1—Continued

| Exercise Description                                                                                                                                                                                                                                                         | Exercise Intervention Characteristics |                                   |                                                      | Comparison Group                                   |
|------------------------------------------------------------------------------------------------------------------------------------------------------------------------------------------------------------------------------------------------------------------------------|---------------------------------------|-----------------------------------|------------------------------------------------------|----------------------------------------------------|
|                                                                                                                                                                                                                                                                              | Intervention Time, h <sup>±</sup>     | Delivery Format                   | Other Interventions                                  |                                                    |
| 1) Lumbar extension, repetitive contraction cycles, constant speed, load gradually increased; resistance exercise of the abdominal and thigh muscles                                                                                                                         | 3                                     | Individual                        | None                                                 |                                                    |
| 2) Specific exercise: "platform that oscillates around a resting axis between the subject's feet ... during exercise units, the subject performed slow movements of the hip and waist, with bending in the sagittal and frontal planes and rotation in the horizontal plane" | 3                                     | Individual                        | None                                                 |                                                    |
| 1) Mensendiek exercise: aerobic, stretching, strength, coordination, and ergonomic education                                                                                                                                                                                 | 20                                    | Group                             | None                                                 | No treatment                                       |
| 2) Active back school, 30-min exercise session                                                                                                                                                                                                                               | 20                                    | Group                             | Back school                                          |                                                    |
| 1) Ordinary activity level: walking exercise program                                                                                                                                                                                                                         | 36                                    | Independent home exercises        | None                                                 | Other conservative treatment                       |
| 2) Medical exercise therapy: mobilizing and strengthening with special equipment; aerobic exercise warm-up                                                                                                                                                                   | 36                                    | Group                             | None                                                 |                                                    |
| 1) Aerobic exercises                                                                                                                                                                                                                                                         | NA                                    | NA                                | Advice to stay active or education                   |                                                    |
| 2) Flexion exercises, posture, and behavioral therapy                                                                                                                                                                                                                        | NA                                    | NA                                | Advice to stay active or education                   |                                                    |
| 1) Increasing aerobic fitness (fast walking, slow jogging); warm-up, cooldown stretching                                                                                                                                                                                     | 16                                    | Group                             | None                                                 | 1) No treatment                                    |
| 2) Behavioral and exercise therapy: same as exercise plus behavioral therapy (with spousal participation)                                                                                                                                                                    | 16                                    | Group                             | Behavioral therapy                                   | 2) Other conservative treatment                    |
| 1) Sagittal loading flexibility or mobilizing exercises                                                                                                                                                                                                                      | 12                                    | Independent home exercises        | Passive modality                                     | Other conservative treatment                       |
| 1) Stretching, mobilizing, strengthening exercises                                                                                                                                                                                                                           | 7.5                                   | Group; independent home exercises | Advice to stay active or education                   |                                                    |
| 2) Stretching, mobilizing, strengthening exercises plus electroacupuncture                                                                                                                                                                                                   | 7.5                                   | Group; independent home exercises | Passive modality; advice to stay active or education |                                                    |
| 1) Warm-up, stretching, progressive exercises, light aerobics on land                                                                                                                                                                                                        | 8                                     | Group                             | None                                                 |                                                    |
| 2) Warm-up, stretching, progressive exercises, light aerobics in water                                                                                                                                                                                                       | 8                                     | Group                             | None                                                 |                                                    |
| 1) Flexion exercises                                                                                                                                                                                                                                                         | 3.5                                   | Individual                        | Passive modality                                     | 1) No treatment<br>2) Other conservative treatment |
| 1) Terapi Master (Nordisk Terapi, Arendal, Norway) device for general exercise: strengthening, stretching                                                                                                                                                                    | 39                                    | Supervised home exercises         | None                                                 |                                                    |
| 2) Conventional physical therapy exercises: low-tech strengthening, stretching                                                                                                                                                                                               | 39                                    | Supervised home exercises         | None                                                 |                                                    |
