# Supplementary material
Source: HighWire-hosted journal article supplement (https://annals.highwire.org/content/suppl/2005/04/28/142.9.765)
Supplement: Hayden_AT1_142-9-765-DC2-1.pdf [file Hayden_AT1_142-9-765-DC2-1.pdf]

Appendix Table 2. Results Available for Trials Included in Systematic Review\*

| Study, Year (Reference)          | Rating of Results† | Outcome Measures Reported (Scale)                    | Initial Pain Intensity |             | Pain Intensity at Follow-up |             |              |             |             |             |
|----------------------------------|--------------------|------------------------------------------------------|------------------------|-------------|-----------------------------|-------------|--------------|-------------|-------------|-------------|
|                                  |                    |                                                      |                        |             | Short-Term                  |             | Intermediate |             | Long-Term   |             |
|                                  |                    |                                                      | Ex                     | C           | Ex                          | C           | Ex           | C           | Ex          | C           |
| <b>Acute populations</b>         |                    |                                                      |                        |             |                             |             |              |             |             |             |
| Chok et al., 1999 (62)‡          | Positive           | Pain (VAS), function (RMDQ)                          | 23.0 ± 24.0            | 26.7 ± 19.7 | 10.2 ± 29.9                 | 22.8 ± 18.5 | 8.1 ± 34.7   | 20.1 ± 24.4 |             |             |
| Delitto et al., 1993 (65)        | Unclear            | Function (ODQ)                                       |                        |             |                             |             |              |             |             |             |
| Faas et al., 1993 (37)           | Neutral            | Pain (VAS/85 points), function (LOM), RTW            | 36.1                   | 36.6        | 17.1 ± 21.0                 | 14.6 ± 22.0 | 12.1 ± 24.0  | 12.6 ± 30.0 | 10.1 ± 23.0 | 9.6 ± 26.0  |
| Farrell and Twomey, 1982 (68)    | Neutral            | Pain (VAS/10 points), function (BU), global          | 5.2                    | 4.9         | 0.3                         | 0.3         |              |             |             |             |
| Gilbert et al., 1985 (69)§       | Neutral            | Pain (MPQ), function (ADS)                           | 22.7 ± 6.7             | 25.2 ± 8.6  | 7.5 ± 1.2                   | 7.7 ± 2.0   |              |             |             |             |
| Hides et al., 1996 (95)          | Neutral            | Pain (VAS), function (RMDQ)                          | 42                     | 47          | 0                           | 11          |              |             |             |             |
| Malmivaara et al., 1995 (25)     | Negative           | Pain (VAS/10 points), function (ODQ), RTW            | 6.1                    | 5.9         | 3.1                         | 2.4         | 1.8 ± 1.8    | 2.1 ± 1.8   |             |             |
| Seferlis et al., 1998 (76)       | Neutral            | Pain (VAS/10 points), function (ODQ), RTW            | 5.1 ± 1.4              | 5.1 ± 1.4   | 4.6 ± 1.7                   | 4.6 ± 1.7   | 3.5 ± 2.6    | 3.5 ± 2.6   | 2.5 ± 1.7   | 2.5 ± 1.7   |
| Stankovic and Johnell, 1990 (54) | Unclear            | Pain (VAS), RTW                                      |                        | 5.1 ± 1.4   |                             | 4.6 ± 1.7   |              | 3.5 ± 2.6   |             | 2.5 ± 1.7   |
| Underwood and Morgan, 1998 (80)  | Neutral            | Pain (VAS), function (ODQ), RTW, global              | 44.4                   | 50.4        | 18.0 ± 28.4                 | 23.4 ± 28.4 | 11.1 ± 27.6  | 12.0 ± 27.6 | 8.6 ± 31.8  | 13.7 ± 31.8 |
| Waterworth and Hunter, 1985 (81) | Unclear            | Pain (Likert/4 points), global                       | 2.1                    | 2.0         | 0.4                         | 0.4         |              |             |             |             |
| <b>Subacute populations</b>      |                    |                                                      |                        |             |                             |             |              |             |             |             |
| Cherkin et al., 1998 (35)        | Neutral            | Pain (VAS/10 points), function (RMDQ/23 points), RTW | 6.0 ± 2.5              | 5.5 ± 2.1   | 2.3 ± 2.9                   | 1.9 ± 3.3   | 2.7 ± 2.8    | 2.0 ± 2.2   | 2.0         | 1.6         |
| Davies et al., 1979 (64)         | Unclear            | Pain (VAS), RTW, global                              | 11.2 ± 4.4             | 8.7 ± 3.3   | 5.0 ± 6.0                   | 6.0 ± 5.1   | 1.8 ± 3.6    | 3.7 ± 5.4   |             |             |
| Lindström et al., 1992 (22)      | Unclear            | Pain (VAS), RTW                                      | 41.3 ± 28.2            | 44.5 ± 28.8 |                             | 3.1 ± 3.2   |              | 3.2 ± 3.2   |             | 2.8         |
| Moffett et al., 1999 (47)        | Positive           | Pain (APS), function (RMDQ), RTW                     | 27.9 ± 11.1            | 25.5 ± 10.9 | 16.4 ± 9.9                  | 16.5 ± 9.9  | 17.7 ± 12.0  | 17.4 ± 12.0 | 15.0 ± 11.2 | 17.0 ± 11.2 |
| Staal et al., 2004 (90)          | Positive           | Pain (NRS/10 points), function (RMDQ), RTW           | 6.7 ± 1.8              | 6.4 ± 1.7   | 2.8 ± 2.4                   | 2.5 ± 2.8   | 2.9 ± 3.1    | 2.7 ± 2.8   |             |             |
| Storheim et al., 2003 (91)       | Neutral            | Pain (VAS), function (RMDQ), RTW                     | 53.2 ± 23.2            | 55.7 ± 19.6 |                             |             | 38.3 ± 22.4  | 34.8 ± 25.1 |             |             |
| <b>Chronic populations</b>       |                    |                                                      |                        |             |                             |             |              |             |             |             |
| Alexandre et al., 2001 (56)      | Neutral            | Pain (VAS/10 points)                                 | 5.7 ± 8.3              | 5.8 ± 14.7  | 0.6 ± 8.6                   | 3.7 ± 11.3  |              |             |             |             |
| Aure et al., 2003 (32)           | Positive           | Pain (VAS), function (ODQ), RTW                      | 55.0 ± 18.6            |             | 22.0 ± 18.6                 |             | 22.0 ± 21.2  |             | 21.0 ± 18.6 |             |
| Bendix et al., 2000 (60)‡        | Neutral            | Pain (NRS), function (MRS), RTW, global              | 54.0 ± 23.9            |             | 37.0 ± 26.3                 |             | 42.0 ± 23.9  |             | 35.0 ± 23.9 |             |
| Bendix et al., 1995 (57)‡        | Neutral            | Pain (VAS/10 points), function (ADL/30 points), RTW  | 6.0 ± 1.5              |             |                             |             |              |             | 5.7 ± 3.9   |             |
|                                  | Positive           |                                                      | 5.1 ± 2.7              |             |                             |             |              |             | 5.1 ± 4.5   |             |
|                                  | Negative           |                                                      | 5.3                    |             |                             |             | 2.7 ± 2.3    |             | 3.3 ± 3.4   |             |
|                                  |                    |                                                      | 5.4                    | 5.9         |                             |             | 4.4 ± 2.9    | 5.6 ± 2.9   | 5.3 ± 3.3   | 6.5 ± 2.5   |

Appendix Table 2—Continued

| Initial Functional Impairment |             | Functional Impairment at Follow-up |             |              |             |             |             |
|-------------------------------|-------------|------------------------------------|-------------|--------------|-------------|-------------|-------------|
|                               |             | Short-Term                         |             | Intermediate |             | Long-Term   |             |
| Ex                            | C           | Ex                                 | C           | Ex           | C           | Ex          | C           |
| 11.5 ± 4.0                    | 11.0 ± 4.7  | 4.0 ± 6.4                          | 9.5 ± 4.0   | 3.0 ± 5.8    | 4.0 ± 5.4   |             |             |
| 41.0 ± 3.5                    |             | 32.0 ± 4.0                         |             |              |             |             |             |
| 34.0 ± 4.0                    |             | 10.0 ± 4.0                         |             |              |             |             |             |
| 24.3                          | 24.1        | 15.3 ± 19.0                        | 13.1 ± 17.0 | 12.3 ± 20.0  | 12.1 ± 18.0 | 10.3 ± 19.0 | 10.1 ± 18.0 |
|                               | 23.3        |                                    | 13.3 ± 18.0 |              | 10.3 ± 19.0 |             | 8.3 ± 19.0  |
| 1.8                           | 1.9         | 1.2                                | 1.1         |              |             |             |             |
| 35.9 ± 13.7                   | 36.3 ± 13.1 | 21.3 ± 9.2                         | 24.3 ± 10.0 |              |             |             |             |
| 40.4 ± 16.4                   | 36.6 ± 12.4 | 24.4 ± 8.8                         | 20.9 ± 8.5  |              |             |             |             |
| 10.3                          | 13.6        | 0                                  | 3           |              |             |             |             |
| 33.8                          | 34.6        | 18.6 ± 16.4                        | 16.0 ± 16.4 | 10.8 ± 10.2  | 11.8 ± 10.2 |             |             |
|                               | 32.0 ± 0.0  |                                    | 10.0 ± 0.0  |              | 7.4 ± 0.0   |             |             |
| 30.0 ± 18.0                   | 30.0 ± 18.0 | 20.0 ± 18.0                        | 20.0 ± 18.0 | 11.7 ± 12.0  | 11.7 ± 12.0 | 9.8 ± 11.0  | 9.8 ± 11.0  |
| 30.0 ± 18.0                   |             | 20.0 ± 18.0                        |             | 11.7 ± 12.0  |             | 9.8 ± 11.0  |             |
| 26.2                          | 35.6        | 7.6 ± 19.6                         | 11.5 ± 19.6 | 4.7 ± 20.4   | 7.0 ± 20.4  | 4.7 ± 20.4  | 8.0 ± 20.4  |
|                               |             |                                    |             |              |             |             |             |
| 12.2 ± 5.6                    | 12.1 ± 5.5  | 4.1 ± 4.6                          | 3.7 ± 4.4   | 4.1 ± 5.0    | 3.1 ± 4.4   | 2.6         | 2.6         |
|                               | 11.7 ± 5.4  |                                    | 4.9 ± 4.3   |              | 4.3 ± 4.9   |             | 4.5         |
| 6.7 ± 4.0                     | 5.6 ± 3.9   | 3.8 ± 3.2                          | 3.6 ± 3.2   | 3.7 ± 3.9    | 3.9 ± 3.9   | 3.5 ± 3.7   | 3.8 ± 3.7   |
| 13.3 ± 4.6                    | 13.0 ± 4.9  | 6.3 ± 6.7                          | 4.9 ± 6.2   | 7.8 ± 6.6    | 6.4 ± 6.6   |             |             |
| 8.2 ± 3.5                     | 8.9 ± 3.4   |                                    |             | 6.1 ± 3.8    | 5.5 ± 4.1   |             |             |
| 39.0 ± 13.2                   |             | 18.0 ± 13.2                        |             | 16.0 ± 13.2  |             | 17.0 ± 13.2 |             |
| 39.0 ± 14.3                   |             | 30.0 ± 12.0                        |             | 30.0 ± 14.3  |             | 26.0 ± 14.3 |             |
| 16.0 ± 7.4                    |             |                                    |             |              |             | 13.0 ± 8.8  |             |
| 16.0 ± 5.9                    |             |                                    |             |              |             | 12.0 ± 13.2 |             |
| 15.5                          |             |                                    |             | 8.5 ± 9.5    |             | 8.9 ± 6.0   |             |
| 14.4                          | 15.3        |                                    |             | 13.5 ± 5.1   | 16.1 ± 7.5  | 13.7 ± 6.9  | 16.4 ± 3.8  |

Continued on following page

Appendix Table 2—Continued

| Study, Year (Reference)            | Rating of Results† | Outcome Measures Reported (Scale)                     | Initial Pain Intensity |             | Pain Intensity at Follow-up |             |              |             |             |             |  |
|------------------------------------|--------------------|-------------------------------------------------------|------------------------|-------------|-----------------------------|-------------|--------------|-------------|-------------|-------------|--|
|                                    |                    |                                                       |                        |             | Short-Term                  |             | Intermediate |             | Long-Term   |             |  |
|                                    |                    |                                                       | Ex                     | C           | Ex                          | C           | Ex           | C           | Ex          | C           |  |
| Bentsen et al., 1997 (33)          | Unclear            | Function (Million), RTW                               |                        |             |                             |             |              |             |             |             |  |
|                                    | Neutral            |                                                       |                        |             |                             |             |              |             |             |             |  |
| Bronfort et al., 1996 (34)         | Neutral            | Pain (VAS/10 points), function (RMDQ)                 | 5.3 ± 1.5              | 5.4 ± 1.4   | 3.4 ± 1.9                   | 3.9 ± 2.1   | 2.7 ± 2.0    | 3.3 ± 2.3   | 2.9         | 2.9         |  |
|                                    | Neutral            |                                                       | 5.5 ± 1.7              |             | 3.6 ± 2.2                   |             | 3.5 ± 2.2    |             | 3.2         |             |  |
| Buswell, 1982 (61)                 | Unclear            | Pain (unknown measure)                                | 6.0 ± 0.0              |             | 2.8 ± 0.0                   |             |              |             |             |             |  |
|                                    | Unclear            |                                                       | 5.5 ± 0.0              |             | 2.5 ± 0.0                   |             |              |             |             |             |  |
| Calmels et al., 2004 (83)          | Neutral            | Pain (VAS), function (QDI)                            |                        |             |                             |             |              |             |             |             |  |
|                                    | Neutral            |                                                       |                        |             |                             |             |              |             |             |             |  |
| Dalichau and Scheele, 2000 (63)    | Unclear            | Pain (VAS/10 points), function (ODQ)                  | 6.3                    | 5.5         | 2.1                         | 5.5         | 3.3          | 5.6         |             |             |  |
|                                    | Unclear            |                                                       | 5.8                    |             | 3.1                         |             | 5.2          |             |             |             |  |
| Descarreux et al., 2002 (66)       | Negative           | Pain (VAS), function (ODQ)                            | 31.3                   |             | 27.8 ± 9.0                  |             |              |             |             |             |  |
|                                    | Positive           |                                                       | 30.9                   |             | 16.6 ± 9.7                  |             |              |             |             |             |  |
| Deyo et al., 1990 (18)             | Positive           | Pain (VAS), function (SIP), global                    | 43.6                   | 38.9        | 19.8 ± 20.4                 | 25.9 ± 20.4 | 26.5 ± 24.6  | 25.6 ± 24.6 |             |             |  |
| Elnaggar et al., 1991 (36)         | Positive           | Pain (MPQ)                                            | 15.9 ± 7.8             |             | 10.6 ± 8.6                  |             |              |             |             |             |  |
|                                    | Positive           |                                                       | 14.1 ± 9.8             |             | 8.9 ± 9.4                   |             |              |             |             |             |  |
| Frost et al., 1995 (19)            | Positive           | Pain (VAS), function (ODQ)                            | 20.9 ± 12.3            | 25.6 ± 17.9 | 12.1 ± 9.9                  | 22.1 ± 20.1 |              |             |             |             |  |
| Frost et al., 2004 (84)            | Neutral            | Function (ODQ), global                                |                        |             |                             |             |              |             |             |             |  |
| Galantino et al., 2004 (85)‡       | Unclear            | Function (ODQ)                                        |                        |             |                             |             |              |             |             |             |  |
| Gur et al., 2003 (86)              | Neutral            | Pain (VAS/10 points), function (RMDQ)                 | 6.2 ± 2.1              | 6.1 ± 1.9   | 1.8 ± 1.2                   | 1.9 ± 1.4   |              |             |             |             |  |
|                                    | Neutral            |                                                       | 6.5 ± 1.6              |             | 2.9 ± 1.3                   |             |              |             |             |             |  |
| Hansen et al., 1993 (21)‡          | Neutral            | Pain (VAS/9 points), global                           | 3.5 ± 0.9              | 4.0 ± 0.8   | 3.0 ± 0.7                   | 3.0 ± 0.4   | 4.0 ± 1.2    | 4.0 ± 0.8   | 2.5 ± 0.8   | 3.0 ± 0.8   |  |
|                                    |                    |                                                       |                        | 5.0 ± 0.8   |                             | 3.0 ± 0.8   |              | 4.0 ± 0.8   |             | 4.0 ± 1.0   |  |
| Hemmilä et al., 1997 (40)          | Positive           | Pain (VAS)                                            | 40.0                   | 46.0        | 30.0                        | 30.0        | 29.0         | 25.0        |             |             |  |
|                                    |                    |                                                       |                        | 43.0        |                             | 25.0        |              | 25.0        |             |             |  |
| Hildebrandt et al., 2000 (43)      | Positive           | Global                                                |                        |             |                             |             |              |             |             |             |  |
| Johanssen et al., 1995 (70)‡       | Unclear            | Pain (Likert/9 points), function (ADL/12 points), RTW | 6.0 ± 1.7              |             | 5.0 ± 2.6                   |             | 4.0 ± 2.6    |             |             |             |  |
|                                    | Unclear            |                                                       | 6.0 ± 1.7              |             | 3.0 ± 3.5                   |             | 4.0 ± 2.6    |             |             |             |  |
| Jouset et al., 2004 (87)           | Neutral            | Pain (VAS/10 points), function (QDI), RTW             | 5.0 ± 2.2              |             |                             |             | 3.1 ± 2.5    |             |             |             |  |
|                                    | Neutral            |                                                       | 4.6 ± 2.2              |             |                             |             | 4.0 ± 2.8    |             |             |             |  |
| Kankaanpää et al., 1999 (44)       | Positive           | Pain (VAS), function (PDI)                            | 54.1 ± 19.6            | 42.8 ± 28.4 | 36.8 ± 28.8                 | 44.9 ± 26.7 | 35.9 ± 27.4  | 46.0 ± 20.5 | 28.0 ± 18.6 | 44.4 ± 22.5 |  |
| Kendall and Jenkins, 1968 (71)     | Unclear            | Global                                                |                        |             |                             |             |              |             |             |             |  |
|                                    | Unclear            |                                                       |                        |             |                             |             |              |             |             |             |  |
|                                    | Unclear            |                                                       |                        |             |                             |             |              |             |             |             |  |
| Kuukkanen and Mälkiä, 2000 (72)    | Neutral            | Pain (VAS/11 points), function (ODQ)                  | 1.9 ± 1.5              | 1.8 ± 1.7   | 1.3 ± 1.2                   | 1.1 ± 1.3   | 1.0 ± 1.3    | 1.3 ± 1.6   | 1.0 ± 1.3   | 1.3 ± 1.8   |  |
| Lidström and Zachrisson, 1970 (73) | Unclear            | Global                                                |                        |             |                             |             |              |             |             |             |  |
| Lie and Frey, 1999 (74)            | Negative           | Global (COS), includes pain and function              |                        |             |                             |             |              |             |             |             |  |
|                                    | Positive           |                                                       |                        |             |                             |             |              |             |             |             |  |

Appendix Table 2—Continued

| Initial Functional Impairment |               | Functional Impairment at Follow-up |               |               |              |               |              |
|-------------------------------|---------------|------------------------------------|---------------|---------------|--------------|---------------|--------------|
|                               |               | Short-Term                         |               | Intermediate  |              | Long-Term     |              |
| Ex                            | C             | Ex                                 | C             | Ex            | C            | Ex            | C            |
| 33.3 ± 17.8                   | 34.7 ± 17.9   | 19.1 ± 19.3                        | 20.8 ± 17.3   | 15.1 ± 17.4   | 18.4 ± 17.1  |               |              |
| 35.0 ± 16.9                   |               | 20.8 ± 17.8                        |               | 20.9 ± 17.0   |              |               |              |
| 48.0 ± 10                     |               | 42.0 ± 18                          |               |               |              |               |              |
| 47.0 ± 14                     |               | 43.0 ± 15                          |               |               |              |               |              |
| 60.0                          | 50.0          | 40.0                               | 49.0          | 45.0          | 52.0         |               |              |
| 55.0                          |               | 42.0                               |               | 52.0          |              |               |              |
| 6.5                           | 6.9           | 3.2 ± 3.1                          | 3.2 ± 3.1     | 3.5 ± 4.0     | 2.5 ± 4.0    |               |              |
| 23.6 ± 9.7                    | 23.6 ± 12.3   | 16.3 ± 10.3                        | 21.2 ± 14.2   | 15.1 ± 8.3    | 23.4 ± 15.2  | 15.4 ± 11.3   | 22.5 ± 15.4  |
| 21.12 ± 11.08                 | 21.6 ± 11.0   | 18.47 ± 9.34                       | 20.27 ± 9.29  | 18.23 ± 11.59 | 19.8 ± 10.61 | 17.85 ± 10.99 | 19.4 ± 11.47 |
| 24.98 ± 10.28                 | 36.73 ± 18.49 | 21.15 ± 10.18                      | 38.91 ± 17.56 |               |              |               |              |
| 17.8 ± 4.6                    | 16.3 ± 3.9    | 6.3 ± 3.5                          | 6.6 ± 2.9     |               |              |               |              |
| 15.1 ± 4.2                    |               | 5.5 ± 3.2                          |               |               |              |               |              |
| 5.0 ± 2.6                     |               | 3.0 ± 3.5                          |               | 2.0 ± 2.6     |              |               |              |
| 6.0 ± 5.2                     |               | 2.0 ± 4.3                          |               | 1.0 ± 4.3     |              |               |              |
| 34.6 ± 15.4                   |               |                                    |               | 22.0 ± 16     |              |               |              |
| 31.6 ± 15.9                   |               |                                    |               | 22.9 ± 17.7   |              |               |              |
| 12.3 ± 10.1                   | 10.1 ± 7.6    | 10.4 ± 11.9                        | 11.6 ± 10.9   | 6.1 ± 5.8     | 13.3 ± 10.8  | 5.3 ± 8.1     | 9.8 ± 9.0    |
| 17.0 ± 9.5                    | 14.0 ± 8.7    | 10.0 ± 7.6                         | 11.0 ± 7.8    | 8.0 ± 6.6     | 12.0 ± 9.0   | 0.0 ± 0.0     | 10.0 ± 9.5   |
|                               |               |                                    |               |               |              | 6.0 ± 5.2     |              |

Continued on following page

Appendix Table 2—Continued

| Study, Year (Reference)                          | Rating of Results† | Outcome Measures Reported (Scale)                  | Initial Pain Intensity |             | Pain Intensity at Follow-up |              |              |              |              |             |             |
|--------------------------------------------------|--------------------|----------------------------------------------------|------------------------|-------------|-----------------------------|--------------|--------------|--------------|--------------|-------------|-------------|
|                                                  |                    |                                                    |                        |             | Short-Term                  |              | Intermediate |              | Long-Term    |             |             |
|                                                  |                    |                                                    | Ex                     | C           | Ex                          | C            | Ex           | C            | Ex           | C           |             |
| Manniche et al., 1988 (26)‡                      | Unclear            | Pain (VAS/30 points), function (ADL/15 points)     | 13.3 ± 4.9             |             | 5.7 ± 9.4                   |              | 5.0 ± 10.7   |              |              |             |             |
|                                                  | Unclear            |                                                    | 14.0 ± 6.9             |             | 10.3 ± 9.7                  |              | 11.1 ± 10.8  |              |              |             |             |
| Mannion et al., 1999 (29)                        | Positive           | Pain (VAS/10 points), function (RMDQ)              | 4.2 ± 1.8              |             | 3.1 ± 2.1                   |              | 2.8 ± 2.1    |              |              | 2.9 ± 2.2   |             |
|                                                  | Positive           |                                                    | 4.1 ± 1.8              |             | 3.6 ± 2.5                   |              | 3.1 ± 2.3    |              |              | 3.2 ± 2.2   |             |
| Moseley et al., 2002 (48)                        | Neutral            |                                                    | 4.4 ± 1.8              |             | 3.2 ± 2.2                   |              | 3.2 ± 2.0    |              |              | 3.2 ± 2.0   |             |
|                                                  | Positive           | Pain (NRS), function (RMDQ/18 points)              | 4.8 ± 0.0              | 4.5 ± 0.0   | 1.9 ± 1.5                   | 3.1 ± 1.5    |              |              |              |             |             |
| Niemistö et al., 2003 (88)                       | Positive           | Pain (VAS), function (ODQ), RTW                    | 60.0 ± 21.0            | 53.3 ± 21.2 |                             |              | 25.0 ± 23.0  | 36.1 ± 23.3  | 26.0 ± 23.0  | 32.2 ± 23.3 |             |
| Peterson et al., 2002 (49)‡                      | Neutral            | Pain (VAS/60 points), function (MRS), RTW, global  | 19.0 ± 13.4            |             | 14.0 ± 18.1                 |              | 17.0 ± 18.1  |              |              | 18.0 ± 14.2 |             |
|                                                  | Positive           |                                                    | 18.5 ± 13.8            |             | 10.0 ± 37.8                 |              | 13.0 ± 30.7  |              |              | 14.0 ± 31.5 |             |
| Preyde, 2000 (50)                                | Neutral            | Pain (PPI), function (RMDQ)                        | 2.2 ± 0.7              | 2.2 ± 0.8   | 1.6 ± 0.8                   | 1.0 ± 0.7    | 1.3 ± 0.8    | 1.2 ± 1.5    |              |             |             |
|                                                  | Positive           |                                                    | 2.4 ± 0.8              | 2.0 ± 0.7   | 0.4 ± 0.6                   | 1.6 ± 0.8    | 0.4 ± 0.6    | 1.8 ± 0.6    |              |             |             |
| Rasmussen-Barr et al., 2003 (89)‡                | Neutral            | Pain (VAS), function (ODQ)                         | 33.0 ± 23.53           | 32.0 ± 25.0 | 20.0 ± 17.65                | 24.0 ± 33.82 | 14.0 ± 16.18 | 22.0 ± 33.82 | 13.0 ± 14.71 | 18.0 ± 29.4 |             |
| Risch et al., 1993 (75)                          | Positive           | Pain (WHY), function (SIP)                         | 3.4 ± 1.6              | 3.7 ± 1.6   | 2.9 ± 1.7                   | 4.1 ± 1.5    |              |              |              |             |             |
| Rittweger et al., 2002 (51)                      | Neutral            | Pain (VAS), function (VAS/70 points)               | 4.5 ± 2.2              |             | 1.2 ± 1.8                   |              |              |              |              |             |             |
|                                                  | Neutral            |                                                    | 4.2 ± 1.9              |             | 1.4 ± 1.8                   |              |              |              |              |             |             |
| Lønn et al., 1999 (46); Soukup et al., 1999 (52) | Neutral            | Pain (VAS), function (VAS)                         | 41.0 ± 15.0            | 42.0 ± 21.0 |                             |              | 23.0 ± 16.0  | 24.0 ± 17.0  | 26.0 ± 19.0  | 32.0 ± 23.0 |             |
|                                                  | Unclear            | Pain (OEP-VAS), function (VAS/10 points)           | 3.5 ± 18.9             |             |                             |              | 1.8 ± 15.7   |              | 2.2 ± 22.0   |             |             |
| Torstensen et al., 1998 (31)                     | Neutral            | Pain (VAS), function (ODQ), RTW                    | 55.0 ± 21.0            |             | 50.4 ± 27.2                 |              |              |              |              | 50.0 ± 28.0 |             |
|                                                  | Neutral            |                                                    | 53.1 ± 21.3            | 50.9 ± 19.2 | 37.2 ± 25.3                 | 39.0 ± 28.0  |              |              |              | 40.5 ± 24.4 | 42.9 ± 29.5 |
| Tritilanunt and Wajanavisit, 2001 (78)           | Positive           | Pain (VAS)                                         | 5.6 ± 1.8              |             | 2.3 ± 1.8                   |              |              |              |              |             |             |
|                                                  | Neutral            |                                                    | 5.4 ± 1.8              |             | 4.0 ± 1.9                   |              |              |              |              |             |             |
| Turner et al., 1990 (79)                         | Neutral            | Pain (MPQ), function (SIP)                         | 19.4 ± 10.6            | 21.0 ± 9.9  | 17.5 ± 10.2                 | 17.7 ± 12.1  | 15.6 ± 9.1   | 19.5 ± 15.7  | 14.9 ± 7.9   | 16.4 ± 13.6 |             |
|                                                  | Positive           |                                                    | 25.5 ± 12.4            | 21.2 ± 8.8  | 14.8 ± 11.4                 | 21.0 ± 10.6  | 13.3 ± 9.1   |              |              | 18.2 ± 13.3 |             |
| Yelland et al., 2004 (92)                        | Neutral            | Pain (VAS), function (RMDQ/23 points)              | 54.6 ± 19.8            | 52.3 ± 20.3 | 42.0 ± 26.5                 | 37.0 ± 45.4  | 33.0 ± 26.5  | 32.0 ± 30.3  | 34.1 ± 28.2  | 35.8 ± 30   |             |
| Yeung et al., 2003 (93)                          | Neutral            | Pain (NRS/10 points), function (VAS)               | 5.88 ± 1.84            |             | 5.19 ± 2.47                 |              | 5.27 ± 2.31  |              |              |             |             |
|                                                  | Positive           |                                                    | 6.38 ± 1.77            |             | 3.77 ± 2.12                 |              | 3.46 ± 2.18  |              |              |             |             |
| Yozbatiran et al., 2004 (94)                     | Neutral            | Pain (VAS/10 points), function (ODQ)               | 5.06 ± 2.28            |             | 2.53 ± 2.28                 |              |              |              |              |             |             |
|                                                  | Neutral            |                                                    | 5.46 ± 2.19            |             | 1.93 ± 1.7                  |              |              |              |              |             |             |
| Zylbergold and Piper, 1981 (82)                  | Neutral            | Pain (Likert/5 points), function (Likert/5 points) | 2.3 ± 1.3              | 2.9 ± 0.9   | 1.3 ± 0.9                   | 1.4 ± 0.1    |              |              |              |             |             |
|                                                  |                    |                                                    |                        | 2.1 ± 1.6   |                             | 1.5 ± 0.8    |              |              |              |             |             |

Appendix Table 2—Continued

| Initial Functional Impairment |              | Functional Impairment at Follow-up |             |               |              |             |             |
|-------------------------------|--------------|------------------------------------|-------------|---------------|--------------|-------------|-------------|
|                               |              | Short-Term                         |             | Intermediate  |              | Long-Term   |             |
| Ex                            | C            | Ex                                 | C           | Ex            | C            | Ex          | C           |
| 10.3 ± 5.4                    |              | 9.0 ± 5.7                          |             | 5.9 ± 9.7     |              |             |             |
| 11.4 ± 6.6                    |              | 8.8 ± 8.7                          |             | 8.3 ± 8.9     |              | 0.0 ± 0.0   |             |
| 10.2 ± 8.3                    |              | 8.5 ± 11.5                         |             | 7.8 ± 9.1     |              |             |             |
| 8.0 ± 5.1                     |              | 6.7 ± 5.0                          |             | 5.7 ± 4.8     |              | 5.8 ± 4.8   |             |
| 7.7 ± 4.7                     |              | 6.3 ± 5.1                          |             | 5.4 ± 4.4     |              | 6.2 ± 4.6   |             |
| 7.9 ± 4.0                     |              | 6.8 ± 4.9                          |             | 7.7 ± 5.3     |              | 7.4 ± 4.9   |             |
| 29.5 ± 9.7                    | 28.8 ± 9.7   |                                    |             | 14.7 ± 11.6   | 18.6 ± 11.0  | 13.7 ± 11.6 | 16.5 ± 11.6 |
| 39.3 ± 16.3                   |              | 29.2 ± 27.3                        |             | 34.8 ± 42.9   |              | 33.3 ± 28.9 |             |
| 36.7 ± 18.4                   |              | 28.6 ± 35.2                        |             | 26.7 ± 31.5   |              | 30.8 ± 36.3 |             |
| 7.2 ± 5.2                     | 8.6 ± 4.4    | 6.8 ± 5.6                          | 3.4 ± 2.8   | 5.7 ± 4.8     | 2.9 ± 3.1    |             |             |
| 8.3 ± 4.2                     | 7.2 ± 4.2    | 2.4 ± 2.8                          | 6.8 ± 3.5   | 1.5 ± 2.0     | 6.5 ± 4.2    |             |             |
| 18.0 ± 14.71                  | 14.0 ± 10.29 | 9.0 ± 10.29                        | 12.0 ± 5.88 | 6.0 ± 5.88    | 13.0 ± 14.71 | 8.0 ± 8.82  | 8.0 ± 16.18 |
| 9.1 ± 9.3                     | 15.2 ± 10.4  | 7.7 ± 9.4                          | 19.3 ± 15.6 |               |              |             |             |
| 20.3 ± 9.9                    |              | 10.5 ± 12.8                        |             | 12.0 ± 12.4   |              |             |             |
| 20.7 ± 14.3                   |              | 11.6 ± 11.1                        |             | 14.8 ± 13.6   |              |             |             |
| 40.0 ± 20.8                   | 41.0 ± 51.3  |                                    |             | 60.0 ± 17.8   | 61.0 ± 21.1  | 58.0 ± 23.8 | 52.0 ± 24.1 |
| 4.7 ± 18.9                    |              |                                    |             | 7.0 ± 18.9    |              | 6.7 ± 22.0  |             |
| 50.0 ± 11.9                   |              | 52.7 ± 16.6                        |             |               |              | 50.6 ± 16.6 |             |
| 51.7 ± 10.7                   | 49.4 ± 10.5  | 46.2 ± 13.1                        | 46.9 ± 13.1 |               |              | 44.1 ± 13.8 | 43.0 ± 12.9 |
| 8.4 ± 8.2                     | 7.9 ± 6.4    | 5.5 ± 6.8                          | 4.7 ± 4.1   | 6.3 ± 10.1    | 7.6 ± 9.9    | 4.7 ± 7.8   | 5.3 ± 6.7   |
| 8.5 ± 4.6                     | 6.2 ± 5.0    | 3.6 ± 3.0                          | 5.4 ± 5.9   | 4.5 ± 4.7     |              | 4.8 ± 3.4   |             |
| 13.0 ± 5.1                    | 15.0 ± 4.3   | 8.5 ± 9.5                          | 11.0 ± 11.4 | 7.5 ± 7.6     | 9.5 ± 9.5    | 8.2 ± 6.7   | 9.9 ± 5.9   |
| 32.49 ± 13.79                 |              | 32.48 ± 15.31                      |             | 25.82 ± 13.11 |              |             |             |
| 35.32 ± 11.72                 |              | 20.36 ± 13.06                      |             | 19.86 ± 10.12 |              |             |             |
| 38.4 ± 14.32                  |              | 21.06 ± 12.73                      |             |               |              |             |             |
| 40.0 ± 20.14                  |              | 20.66 ± 13.49                      |             |               |              |             |             |
| 7.3 ± 3.8                     | 9.8 ± 6.9    | 5.2 ± 1.4                          | 4.7 ± 7.5   |               |              |             |             |
|                               | 8.7 ± 5.4    |                                    | 5.8 ± 4.3   |               |              |             |             |

Continued on following page

Appendix Table 2—Continued

| Study, Year (Reference)     | Rating of Results†   | Outcome Measures Reported (Scale) | Initial Pain Intensity |   | Pain Intensity at Follow-up |   |              |   |           |   |
|-----------------------------|----------------------|-----------------------------------|------------------------|---|-----------------------------|---|--------------|---|-----------|---|
|                             |                      |                                   |                        |   | Short-Term                  |   | Intermediate |   | Long-Term |   |
|                             |                      |                                   | Ex                     | C | Ex                          | C | Ex           | C | Ex        | C |
| <b>Unclear population</b>   |                      |                                   |                        |   |                             |   |              |   |           |   |
| Ljunggren et al., 1997 (45) | Positive<br>Positive | RTW                               |                        |   |                             |   |              |   |           |   |

\* Values are means ( $\pm$ SD) for pain and functional impairment as presented in the study publications, unless otherwise noted. Additional rows for studies report results for additional treatment groups. ADL = activities of daily living scale; ADS = Activity Discomfort Scale; APS = Aberdeen Pain Scale (out of 100 points); BU = Berquist-Ullman functional limitations; C = comparison group; COS = clinical overall score (out of 1000 points); Ex = exercise therapy group; LOM = loss of mobility dimension (out of 100 points); MPQ = McGill Pain Questionnaire (out of 78 points); MRS = Manniche low back pain rating scale (out of 100 points); NRS = numerical rating scale (11-point scale); ODQ = Oswestry Disability Questionnaire (out of 100 points); OEP-VAS = mean visual analogue scale of 13 pain-related questions; PDI = Pain and Disability Index; PPI = present pain intensity of McGill Pain Questionnaire (out of 5 points); QDI = Quebec Disability Index; RMDQ = Roland Morris Disability Questionnaire (out of 24 points, unless otherwise noted); RTW = return to work; SIP = Sickness Impact Factor—Physical (out of 100 points); VAS = visual analogue scale (out of 100 points, unless otherwise noted); WHY = West Haven Yale questionnaire.

† Qualitative, consensus-derived reviewer rating of overall conclusions about the effectiveness of the exercise intervention, with exercise groups listed in same order as described in Table 2.

‡ Values are median ( $\pm$ SD) calculated from the most conservative interquartile range presented.

§ Values presented calculated from rate of change ( $\pm$ SD).

|| Galantino et al. (85) was excluded from quantitative syntheses because of flaw: small study with >50% loss to follow-up.

Appendix Table 2—Continued

| Initial Functional Impairment |   | Functional Impairment at Follow-up |   |              |   |           |   |
|-------------------------------|---|------------------------------------|---|--------------|---|-----------|---|
|                               |   | Short-Term                         |   | Intermediate |   | Long-Term |   |
| Ex                            | C | Ex                                 | C | Ex           | C | Ex        | C |
|                               |   |                                    |   |              |   |           |   |
